# Supplementary material for: Noncovalent Wild-type–Sparing Inhibitors of EGFR T790M
Source: Oxford University Press journal article supplement (doi:10.1158/2159-8290.cd-12-0357), 2012-12-11
Supplement: 21598290cd120357-sup-data2.xls [file 21598290cd120357-sup-data2.xls]

## Sheet: Sheet1
Compound Name	Ambit Gene Symbol	Entrez Gene Symbol	Percent Control
Go6976	AAK1	AAK1	0.55
Go6976	ABL1(E255K)-phosphorylated	ABL1	75
Go6976	ABL1(F317I)-nonphosphorylated	ABL1	77
Go6976	ABL1(F317I)-phosphorylated	ABL1	100
Go6976	ABL1(F317L)-nonphosphorylated	ABL1	84
Go6976	ABL1(F317L)-phosphorylated	ABL1	68
Go6976	ABL1(H396P)-nonphosphorylated	ABL1	49
Go6976	ABL1(H396P)-phosphorylated	ABL1	100
Go6976	ABL1(M351T)-phosphorylated	ABL1	88
Go6976	ABL1(Q252H)-nonphosphorylated	ABL1	67
Go6976	ABL1(Q252H)-phosphorylated	ABL1	73
Go6976	ABL1(T315I)-nonphosphorylated	ABL1	47
Go6976	ABL1(T315I)-phosphorylated	ABL1	38
Go6976	ABL1(Y253F)-phosphorylated	ABL1	100
Go6976	ABL1-nonphosphorylated	ABL1	65
Go6976	ABL1-phosphorylated	ABL1	89
Go6976	ABL2	ABL2	85
Go6976	ACVR1	ACVR1	21
Go6976	ACVR1B	ACVR1B	85
Go6976	ACVR2A	ACVR2A	100
Go6976	ACVR2B	ACVR2B	97
Go6976	ACVRL1	ACVRL1	100
Go6976	ADCK3	CABC1	100
Go6976	ADCK4	ADCK4	93
Go6976	AKT1	AKT1	100
Go6976	AKT2	AKT2	95
Go6976	AKT3	AKT3	100
Go6976	ALK	ALK	2.1
Go6976	AMPK-alpha1	PRKAA1	59
Go6976	AMPK-alpha2	PRKAA2	73
Go6976	ANKK1	ANKK1	70
Go6976	ARK5	NUAK1	89
Go6976	ASK1	MAP3K5	56
Go6976	ASK2	MAP3K6	62
Go6976	AURKA	AURKA	74
Go6976	AURKB	AURKB	32
Go6976	AURKC	AURKC	8
Go6976	AXL	AXL	72
Go6976	BIKE	BMP2K	3.4
Go6976	BLK	BLK	100
Go6976	BMPR1A	BMPR1A	73
Go6976	BMPR1B	BMPR1B	56
Go6976	BMPR2	BMPR2	100
Go6976	BMX	BMX	66
Go6976	BRAF	BRAF	100
Go6976	BRAF(V600E)	BRAF	92
Go6976	BRK	PTK6	77
Go6976	BRSK1	BRSK1	51
Go6976	BRSK2	BRSK2	49
Go6976	BTK	BTK	83
Go6976	CAMK1	CAMK1	76
Go6976	CAMK1D	CAMK1D	93
Go6976	CAMK1G	CAMK1G	66
Go6976	CAMK2A	CAMK2A	27
Go6976	CAMK2B	CAMK2B	63
Go6976	CAMK2D	CAMK2D	33
Go6976	CAMK2G	CAMK2G	41
Go6976	CAMK4	CAMK4	100
Go6976	CAMKK1	CAMKK1	6.1
Go6976	CAMKK2	CAMKK2	1.6
Go6976	CASK	CASK	72
Go6976	CDC2L1	CDC2L1	100
Go6976	CDC2L2	CDC2L2	84
Go6976	CDC2L5	CDC2L5	100
Go6976	CDK11	CDC2L6	91
Go6976	CDK2	CDK2	36
Go6976	CDK3	CDK3	75
Go6976	CDK4-cyclinD1	CDK4	57
Go6976	CDK4-cyclinD3	CDK4	42
Go6976	CDK5	CDK5	61
Go6976	CDK7	CDK7	84
Go6976	CDK8	CDK8	85
Go6976	CDK9	CDK9	100
Go6976	CDKL1	CDKL1	81
Go6976	CDKL2	CDKL2	26
Go6976	CDKL3	CDKL3	91
Go6976	CDKL5	CDKL5	10
Go6976	CHEK1	CHEK1	0.2
Go6976	CHEK2	CHEK2	31
Go6976	CIT	CIT	34
Go6976	CLK1	CLK1	16
Go6976	CLK2	CLK2	38
Go6976	CLK3	CLK3	94
Go6976	CLK4	CLK4	6.1
Go6976	CSF1R	CSF1R	37
Go6976	CSK	CSK	100
Go6976	CSNK1A1	CSNK1A1	100
Go6976	CSNK1A1L	CSNK1A1L	100
Go6976	CSNK1D	CSNK1D	81
Go6976	CSNK1E	CSNK1E	100
Go6976	CSNK1G1	CSNK1G1	100
Go6976	CSNK1G2	CSNK1G2	94
Go6976	CSNK1G3	CSNK1G3	84
Go6976	CSNK2A1	CSNK2A1	80
Go6976	CSNK2A2	CSNK2A2	65
Go6976	CTK	MATK	67
Go6976	DAPK1	DAPK1	78
Go6976	DAPK2	DAPK2	61
Go6976	DAPK3	DAPK3	75
Go6976	DCAMKL1	DCLK1	87
Go6976	DCAMKL2	DCLK2	100
Go6976	DCAMKL3	DCLK3	100
Go6976	DDR1	DDR1	100
Go6976	DDR2	DDR2	100
Go6976	DLK	MAP3K12	89
Go6976	DMPK	DMPK	100
Go6976	DMPK2	CDC42BPG	100
Go6976	DRAK1	STK17A	71
Go6976	DRAK2	STK17B	100
Go6976	DYRK1A	DYRK1A	6.4
Go6976	DYRK1B	DYRK1B	12
Go6976	DYRK2	DYRK2	37
Go6976	EGFR	EGFR	71
Go6976	EGFR(E746-A750del)	EGFR	3.2
Go6976	EGFR(G719C)	EGFR	100
Go6976	EGFR(G719S)	EGFR	100
Go6976	EGFR(L747-E749del, A750P)	EGFR	34
Go6976	EGFR(L747-S752del, P753S)	EGFR	42
Go6976	EGFR(L747-T751del,Sins)	EGFR	11
Go6976	EGFR(L858R)	EGFR	45
Go6976	EGFR(L858R,T790M)	EGFR	19
Go6976	EGFR(L861Q)	EGFR	53
Go6976	EGFR(S752-I759del)	EGFR	74
Go6976	EGFR(T790M)	EGFR	9.6
Go6976	EIF2AK1	EIF2AK1	100
Go6976	EPHA1	EPHA1	97
Go6976	EPHA2	EPHA2	87
Go6976	EPHA3	EPHA3	53
Go6976	EPHA4	EPHA4	97
Go6976	EPHA5	EPHA5	96
Go6976	EPHA6	EPHA6	86
Go6976	EPHA7	EPHA7	81
Go6976	EPHA8	EPHA8	90
Go6976	EPHB1	EPHB1	97
Go6976	EPHB2	EPHB2	100
Go6976	EPHB3	EPHB3	85
Go6976	EPHB4	EPHB4	100
Go6976	EPHB6	EPHB6	50
Go6976	ERBB2	ERBB2	87
Go6976	ERBB3	ERBB3	94
Go6976	ERBB4	ERBB4	82
Go6976	ERK1	MAPK3	96
Go6976	ERK2	MAPK1	100
Go6976	ERK3	MAPK6	74
Go6976	ERK4	MAPK4	100
Go6976	ERK5	MAPK7	0.1
Go6976	ERK8	MAPK15	0.45
Go6976	ERN1	ERN1	43
Go6976	FAK	PTK2	73
Go6976	FER	FER	3.2
Go6976	FES	FES	85
Go6976	FGFR1	FGFR1	74
Go6976	FGFR2	FGFR2	95
Go6976	FGFR3	FGFR3	97
Go6976	FGFR3(G697C)	FGFR3	100
Go6976	FGFR4	FGFR4	100
Go6976	FGR	FGR	84
Go6976	FLT1	FLT1	95
Go6976	FLT3	FLT3	1.4
Go6976	FLT3(D835H)	FLT3	2.6
Go6976	FLT3(D835Y)	FLT3	0
Go6976	FLT3(ITD)	FLT3	0.2
Go6976	FLT3(K663Q)	FLT3	0.95
Go6976	FLT3(N841I)	FLT3	0
Go6976	FLT3(R834Q)	FLT3	12
Go6976	FLT4	FLT4	62
Go6976	FRK	FRK	84
Go6976	FYN	FYN	92
Go6976	GAK	GAK	2
Go6976	GCN2(Kin.Dom.2,S808G)	EIF2AK4	77
Go6976	GRK1	GRK1	15
Go6976	GRK4	GRK4	3
Go6976	GRK7	GRK7	10
Go6976	GSK3A	GSK3A	100
Go6976	GSK3B	GSK3B	81
Go6976	HCK	HCK	100
Go6976	HIPK1	HIPK1	32
Go6976	HIPK2	HIPK2	15
Go6976	HIPK3	HIPK3	12
Go6976	HIPK4	HIPK4	8
Go6976	HPK1	MAP4K1	33
Go6976	HUNK	HUNK	87
Go6976	ICK	ICK	20
Go6976	IGF1R	IGF1R	85
Go6976	IKK-alpha	CHUK	88
Go6976	IKK-beta	IKBKB	50
Go6976	IKK-epsilon	IKBKE	99
Go6976	INSR	INSR	84
Go6976	INSRR	INSRR	100
Go6976	IRAK1	IRAK1	14
Go6976	IRAK3	IRAK3	12
Go6976	IRAK4	IRAK4	0.2
Go6976	ITK	ITK	40
Go6976	JAK1(JH1domain-catalytic)	JAK1	10
Go6976	JAK1(JH2domain-pseudokinase)	JAK1	75
Go6976	JAK2(JH1domain-catalytic)	JAK2	0.2
Go6976	JAK3(JH1domain-catalytic)	JAK3	0
Go6976	JNK1	MAPK8	18
Go6976	JNK2	MAPK9	46
Go6976	JNK3	MAPK10	20
Go6976	KIT	KIT	81
Go6976	KIT(A829P)	KIT	54
Go6976	KIT(D816H)	KIT	30
Go6976	KIT(D816V)	KIT	2
Go6976	KIT(L576P)	KIT	46
Go6976	KIT(V559D)	KIT	71
Go6976	KIT(V559D,T670I)	KIT	57
Go6976	KIT(V559D,V654A)	KIT	100
Go6976	LATS1	LATS1	31
Go6976	LATS2	LATS2	36
Go6976	LCK	LCK	100
Go6976	LIMK1	LIMK1	96
Go6976	LIMK2	LIMK2	100
Go6976	LKB1	STK11	4.4
Go6976	LOK	STK10	28
Go6976	LRRK2	LRRK2	19
Go6976	LRRK2(G2019S)	LRRK2	9.4
Go6976	LTK	LTK	4.2
Go6976	LYN	LYN	100
Go6976	LZK	MAP3K13	33
Go6976	MAK	MAK	100
Go6976	MAP3K1	MAP3K1	100
Go6976	MAP3K15	MAP3K15	97
Go6976	MAP3K2	MAP3K2	0.1
Go6976	MAP3K3	MAP3K3	2.1
Go6976	MAP3K4	MAP3K4	99
Go6976	MAP4K2	MAP4K2	1.1
Go6976	MAP4K3	MAP4K3	6
Go6976	MAP4K4	MAP4K4	2.2
Go6976	MAP4K5	MAP4K5	7.8
Go6976	MAPKAPK2	MAPKAPK2	100
Go6976	MAPKAPK5	MAPKAPK5	100
Go6976	MARK1	MARK1	64
Go6976	MARK2	MARK2	9.8
Go6976	MARK3	MARK3	16
Go6976	MARK4	MARK4	72
Go6976	MAST1	MAST1	100
Go6976	MEK1	MAP2K1	71
Go6976	MEK2	MAP2K2	61
Go6976	MEK3	MAP2K3	5
Go6976	MEK4	MAP2K4	1.2
Go6976	MEK5	MAP2K5	58
Go6976	MEK6	MAP2K6	15
Go6976	MELK	MELK	22
Go6976	MERTK	MERTK	89
Go6976	MET	MET	88
Go6976	MET(M1250T)	MET	100
Go6976	MET(Y1235D)	MET	80
Go6976	MINK	MINK1	1
Go6976	MKK7	MAP2K7	79
Go6976	MKNK1	MKNK1	86
Go6976	MKNK2	MKNK2	11
Go6976	MLCK	MYLK3	100
Go6976	MLK1	MAP3K9	0.65
Go6976	MLK2	MAP3K10	98
Go6976	MLK3	MAP3K11	17
Go6976	MRCKA	CDC42BPA	94
Go6976	MRCKB	CDC42BPB	100
Go6976	MST1	STK4	5.4
Go6976	MST1R	MST1R	100
Go6976	MST2	STK3	0.8
Go6976	MST3	STK24	92
Go6976	MST4	MST4	100
Go6976	MTOR	FRAP1	52
Go6976	MUSK	MUSK	100
Go6976	MYLK	MYLK	56
Go6976	MYLK2	MYLK2	58
Go6976	MYLK4	MYLK4	17
Go6976	MYO3A	MYO3A	35
Go6976	MYO3B	MYO3B	100
Go6976	NDR1	STK38	100
Go6976	NDR2	STK38L	66
Go6976	NEK1	NEK1	99
Go6976	NEK11	NEK11	100
Go6976	NEK2	NEK2	100
Go6976	NEK3	NEK3	100
Go6976	NEK4	NEK4	100
Go6976	NEK5	NEK5	100
Go6976	NEK6	NEK6	100
Go6976	NEK7	NEK7	100
Go6976	NEK9	NEK9	100
Go6976	NIM1	MGC42105	100
Go6976	NLK	NLK	100
Go6976	OSR1	OXSR1	100
Go6976	p38-alpha	MAPK14	95
Go6976	p38-beta	MAPK11	97
Go6976	p38-delta	MAPK13	100
Go6976	p38-gamma	MAPK12	68
Go6976	PAK1	PAK1	84
Go6976	PAK2	PAK2	51
Go6976	PAK3	PAK3	70
Go6976	PAK4	PAK4	4
Go6976	PAK6	PAK6	1.4
Go6976	PAK7	PAK7	3.4
Go6976	PCTK1	PCTK1	93
Go6976	PCTK2	PCTK2	100
Go6976	PCTK3	PCTK3	91
Go6976	PDGFRA	PDGFRA	100
Go6976	PDGFRB	PDGFRB	42
Go6976	PDPK1	PDPK1	41
Go6976	PFCDPK1(P.falciparum)	PFB0815w	35
Go6976	PFPK5(P.falciparum)	MAL13P1.279	85
Go6976	PFTAIRE2	PFTK2	100
Go6976	PFTK1	PFTK1	100
Go6976	PHKG1	PHKG1	0.1
Go6976	PHKG2	PHKG2	4.4
Go6976	PIK3C2B	PIK3C2B	100
Go6976	PIK3C2G	PIK3C2G	70
Go6976	PIK3CA	PIK3CA	100
Go6976	PIK3CA(C420R)	PIK3CA	46
Go6976	PIK3CA(E542K)	PIK3CA	100
Go6976	PIK3CA(E545A)	PIK3CA	100
Go6976	PIK3CA(E545K)	PIK3CA	100
Go6976	PIK3CA(H1047L)	PIK3CA	43
Go6976	PIK3CA(H1047Y)	PIK3CA	100
Go6976	PIK3CA(I800L)	PIK3CA	19
Go6976	PIK3CA(M1043I)	PIK3CA	93
Go6976	PIK3CA(Q546K)	PIK3CA	100
Go6976	PIK3CB	PIK3CB	88
Go6976	PIK3CD	PIK3CD	45
Go6976	PIK3CG	PIK3CG	3.1
Go6976	PIK4CB	PI4KB	62
Go6976	PIM1	PIM1	32
Go6976	PIM2	PIM2	100
Go6976	PIM3	PIM3	8.9
Go6976	PIP5K1A	PIP5K1A	1.6
Go6976	PIP5K1C	PIP5K1C	100
Go6976	PIP5K2B	PIP4K2B	2
Go6976	PIP5K2C	PIP4K2C	75
Go6976	PKAC-alpha	PRKACA	100
Go6976	PKAC-beta	PRKACB	67
Go6976	PKMYT1	PKMYT1	100
Go6976	PKN1	PKN1	9.4
Go6976	PKN2	PKN2	12
Go6976	PKNB(M.tuberculosis)	pknB	100
Go6976	PLK1	PLK1	100
Go6976	PLK2	PLK2	100
Go6976	PLK3	PLK3	100
Go6976	PLK4	PLK4	6.5
Go6976	PRKCD	PRKCD	43
Go6976	PRKCE	PRKCE	66
Go6976	PRKCH	PRKCH	18
Go6976	PRKCI	PRKCI	86
Go6976	PRKCQ	PRKCQ	59
Go6976	PRKD1	PRKD1	24
Go6976	PRKD2	PRKD2	4.8
Go6976	PRKD3	PRKD3	2.8
Go6976	PRKG1	PRKG1	67
Go6976	PRKG2	PRKG2	11
Go6976	PRKR	EIF2AK2	89
Go6976	PRKX	PRKX	53
Go6976	PRP4	PRPF4B	12
Go6976	PYK2	PTK2B	19
Go6976	QSK	KIAA0999	100
Go6976	RAF1	RAF1	100
Go6976	RET	RET	0.6
Go6976	RET(M918T)	RET	0.15
Go6976	RET(V804L)	RET	0.1
Go6976	RET(V804M)	RET	0
Go6976	RIOK1	RIOK1	0.6
Go6976	RIOK2	RIOK2	64
Go6976	RIOK3	RIOK3	1.2
Go6976	RIPK1	RIPK1	100
Go6976	RIPK2	RIPK2	100
Go6976	RIPK4	RIPK4	5.2
Go6976	RIPK5	DSTYK	2
Go6976	ROCK1	ROCK1	22
Go6976	ROCK2	ROCK2	18
Go6976	ROS1	ROS1	1.8
Go6976	RPS6KA4(Kin.Dom.1-N-terminal)	RPS6KA4	46
Go6976	RPS6KA4(Kin.Dom.2-C-terminal)	RPS6KA4	100
Go6976	RPS6KA5(Kin.Dom.1-N-terminal)	RPS6KA5	52
Go6976	RPS6KA5(Kin.Dom.2-C-terminal)	RPS6KA5	71
Go6976	RSK1(Kin.Dom.1-N-terminal)	RPS6KA1	36
Go6976	RSK1(Kin.Dom.2-C-terminal)	RPS6KA1	88
Go6976	RSK2(Kin.Dom.1-N-terminal)	RPS6KA3	25
Go6976	RSK3(Kin.Dom.1-N-terminal)	RPS6KA2	5.4
Go6976	RSK3(Kin.Dom.2-C-terminal)	RPS6KA2	100
Go6976	RSK4(Kin.Dom.1-N-terminal)	RPS6KA6	4.7
Go6976	RSK4(Kin.Dom.2-C-terminal)	RPS6KA6	100
Go6976	S6K1	RPS6KB1	23
Go6976	SBK1	SBK1	82
Go6976	SgK110	SgK110	13
Go6976	SGK3	SGK3	72
Go6976	SIK	SIK1	83
Go6976	SIK2	SIK2	36
Go6976	SLK	SLK	69
Go6976	SNARK	NUAK2	4.4
Go6976	SNRK	SNRK	69
Go6976	SRC	SRC	100
Go6976	SRMS	SRMS	100
Go6976	SRPK1	SRPK1	5.6
Go6976	SRPK2	SRPK2	9.2
Go6976	SRPK3	SRPK3	3.8
Go6976	STK16	STK16	84
Go6976	STK33	STK33	1.5
Go6976	STK35	STK35	73
Go6976	STK36	STK36	100
Go6976	STK39	STK39	76
Go6976	SYK	SYK	2.4
Go6976	TAK1	MAP3K7	8
Go6976	TAOK1	TAOK1	8
Go6976	TAOK2	TAOK2	7.7
Go6976	TAOK3	TAOK3	12
Go6976	TBK1	TBK1	92
Go6976	TEC	TEC	92
Go6976	TESK1	TESK1	43
Go6976	TGFBR1	TGFBR1	79
Go6976	TGFBR2	TGFBR2	100
Go6976	TIE1	TIE1	100
Go6976	TIE2	TEK	99
Go6976	TLK1	TLK1	83
Go6976	TLK2	TLK2	88
Go6976	TNIK	TNIK	0.3
Go6976	TNK1	TNK1	2
Go6976	TNK2	TNK2	18
Go6976	TNNI3K	TNNI3K	100
Go6976	TRKA	NTRK1	0.1
Go6976	TRKB	NTRK2	1.2
Go6976	TRKC	NTRK3	0.15
Go6976	TRPM6	TRPM6	81
Go6976	TSSK1B	TSSK1B	82
Go6976	TTK	TTK	23
Go6976	TXK	TXK	11
Go6976	TYK2(JH1domain-catalytic)	TYK2	0.6
Go6976	TYK2(JH2domain-pseudokinase)	TYK2	84
Go6976	TYRO3	TYRO3	78
Go6976	ULK1	ULK1	92
Go6976	ULK2	ULK2	86
Go6976	ULK3	ULK3	15
Go6976	VEGFR2	KDR	82
Go6976	VRK2	VRK2	89
Go6976	WEE1	WEE1	100
Go6976	WEE2	WEE2	100
Go6976	YANK1	STK32A	94
Go6976	YANK2	STK32B	100
Go6976	YANK3	STK32C	100
Go6976	YES	YES1	96
Go6976	YSK1	STK25	100
Go6976	YSK4	YSK4	0
Go6976	ZAK	ZAK	96
Go6976	ZAP70	ZAP70	35
